# Supplementary material for: Increased localization of APP‐C99 in mitochondria‐associated ER membranes causes mitochondrial dysfunction in Alzheimer disease
Source: PubMed Central journal article supplement (PMC5731665; doi:10.15252/embj.201796797), 2017-10-10
Supplement: EMBJ-36-3356-s002.pdf [file EMBJ-36-3356-s002.pdf]

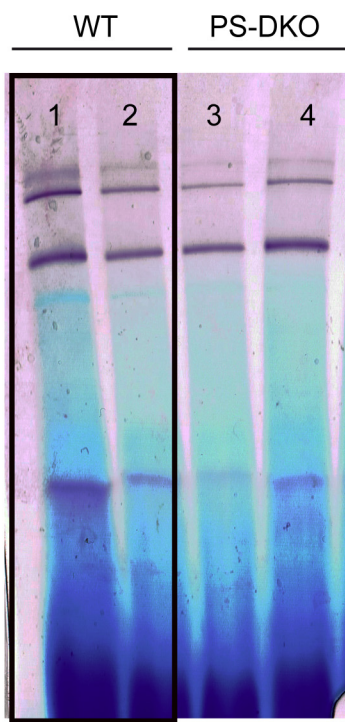

Complex I in gel activity

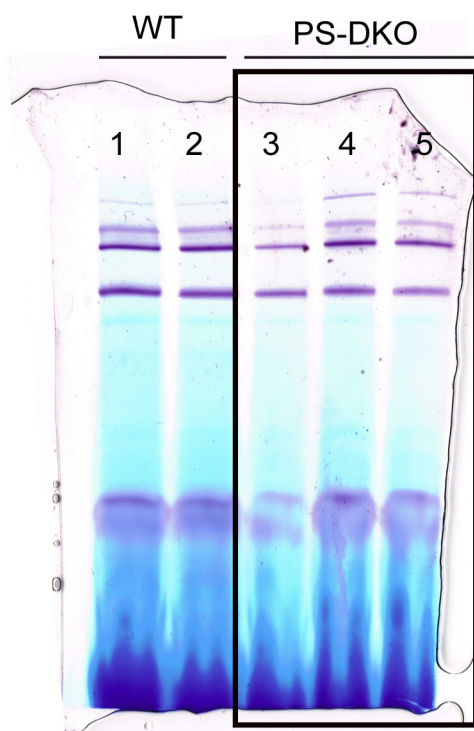

Complex I in gel activity

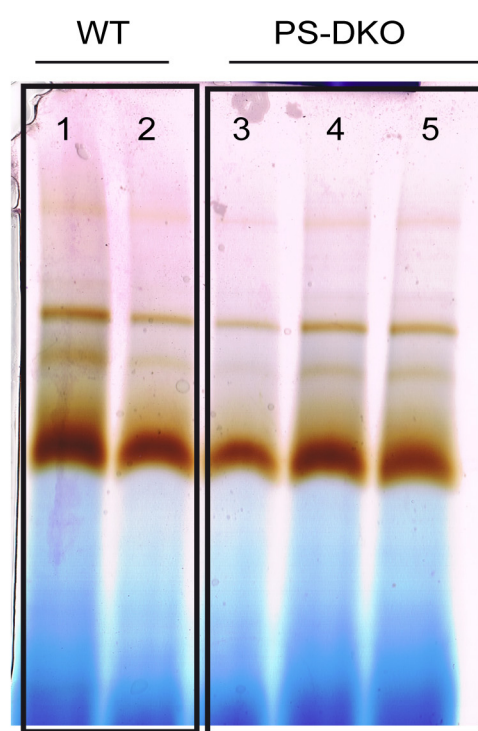

Complex IV in gel activity

- 1-WT cells with DMSO
- 2-WT cells with DAPT
- 3-PS-DKO cells with DMSO
- 4-PS-DKO cells + BACE1 inhibitor
- 5-PS-DKO cells + Myriocin

Squared lanes were used for the final figure

Source Data figure 6B and 6C
